# Supplementary material for: Stress-dependent cell stiffening by tardigrade tolerance proteins that reversibly form a filamentous network and gel
Source: PubMed Central journal article supplement (PMC9592077; doi:10.1371/journal.pbio.3001780), 2022-09-06
Supplement: pbio.3001780.s026.pdf [file pbio.3001780.s026.pdf]

**S1 Table Fluorescent-tagged markers for various cytoskeletons and organelles used in this study**

| Addgene # | Plasmid/Marker name         | Target structure         | Fluorescent tag |
|-----------|-----------------------------|--------------------------|-----------------|
| 55065     | mCherry-keratin-17          | Keratin                  | mCherry         |
| 55156     | mCherry-vimentin-7          | Vimentin                 | mCherry         |
| 85047     | mScarlet-I-alpha-tubulin-C1 | Tubulin                  | mScarlet-I      |
| 85056     | pLifeact-mScarlet-I         | Actin                    | mScarlet-I      |
| 98831     | mScarlet-I-lamin-b          | Lamin                    | mScarlet-I      |
| 85068     | pcytERM-mScarlet-I-N1       | Endoplasmic<br>reticulum | mScarlet-I      |
| 98818     | 4xmts-mScarlet-I            | Mitochondria             | mScarlet-I      |
